# Supplementary material for: Programming of cardiac metabolism by miR-15b-5p, a miRNA released in cardiac extracellular vesicles following ischemia-reperfusion injury
Source: PubMed Central journal article supplement (PMC10832484; doi:10.1016/j.molmet.2024.101875), 2024-01-11

# A

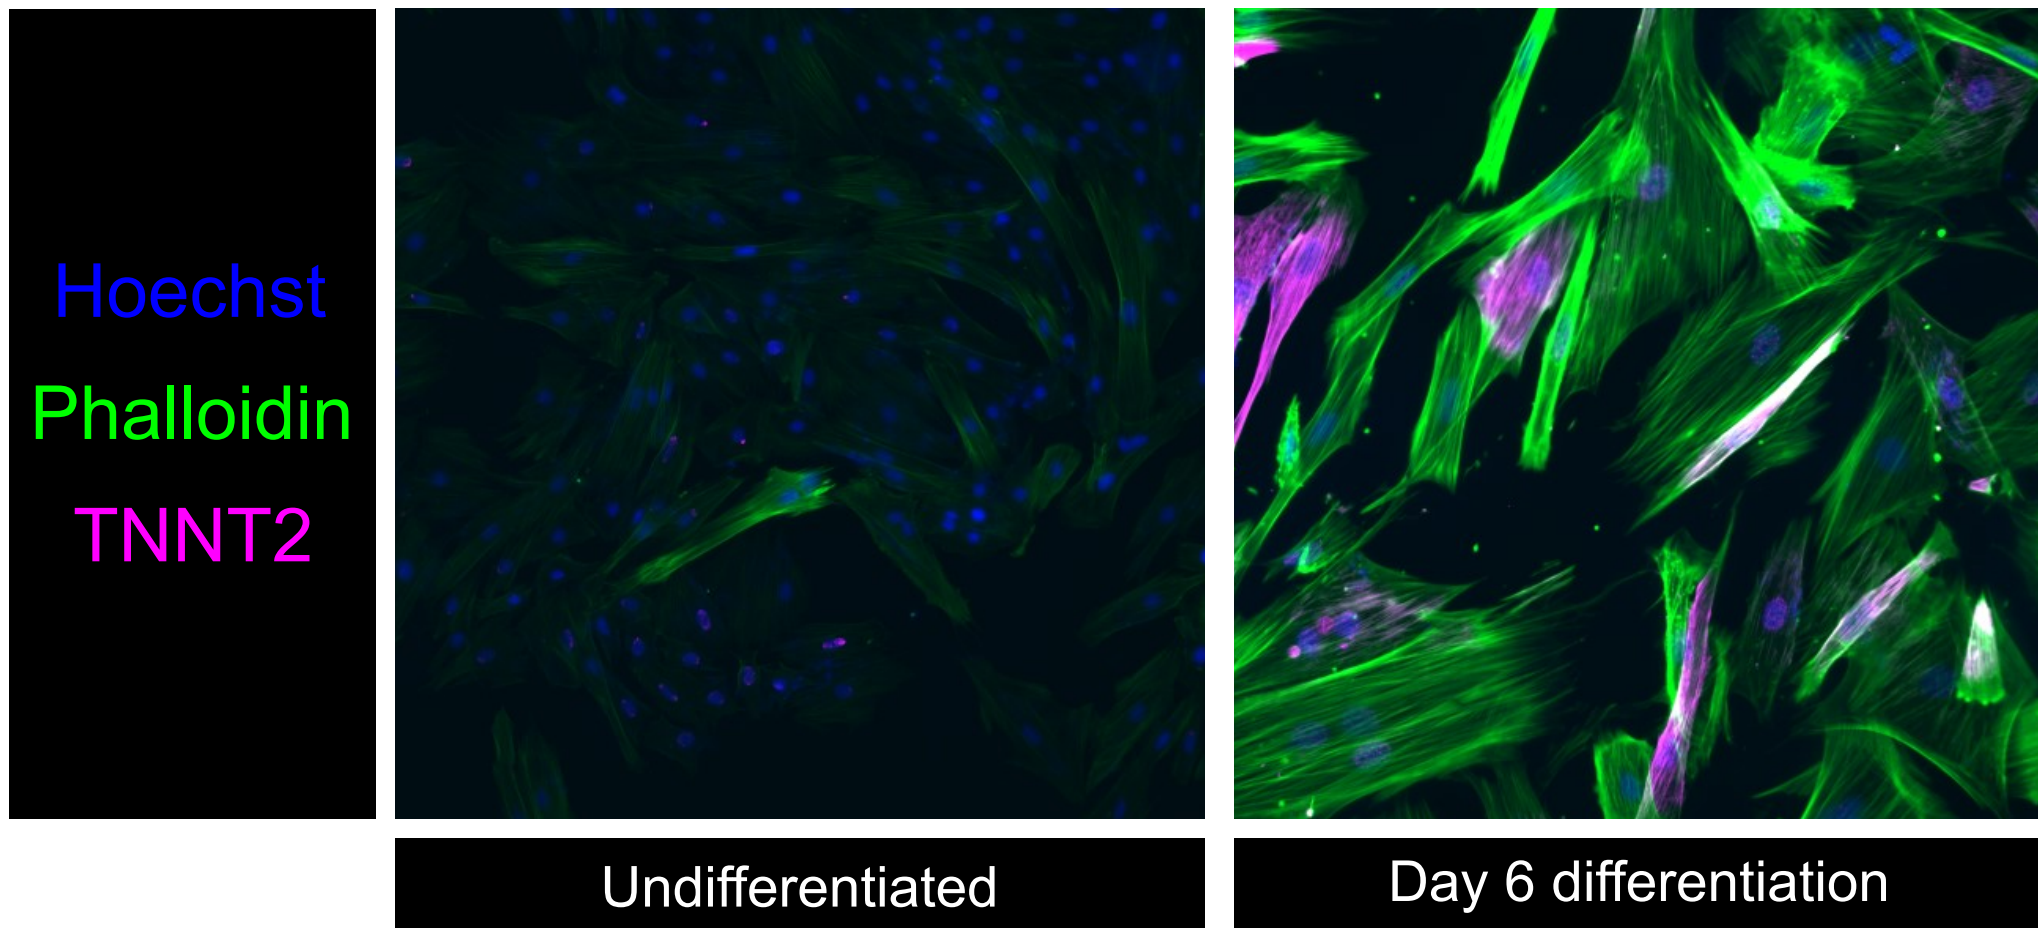

# B

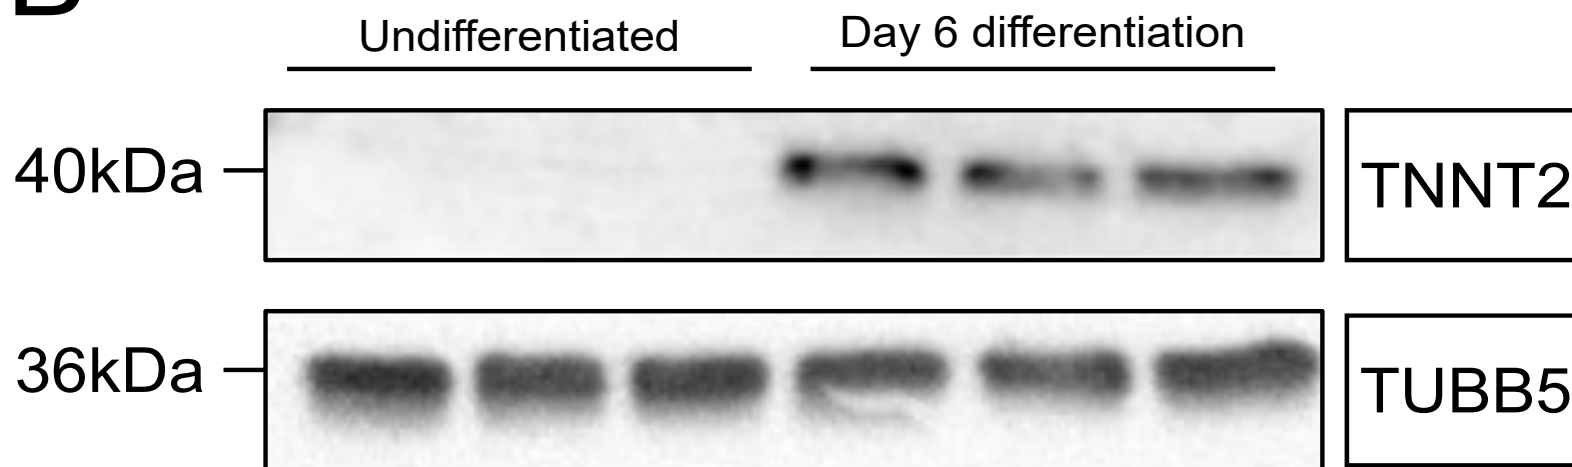

Supplement: mmc1.pdf [file mmc1.pdf]
