# Supplementary material for: Programming of cardiac metabolism by miR-15b-5p, a miRNA released in cardiac extracellular vesicles following ischemia-reperfusion injury
Source: PubMed Central journal article supplement (PMC10832484; doi:10.1016/j.molmet.2024.101875), 2024-01-11

**A**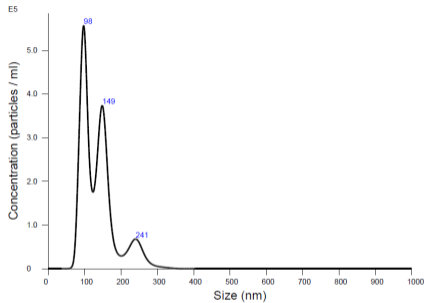

Averaged FTLA Concentration / Size for Experiment:  
Capture 2019-01-22 14-37-47  
Error bars indicate + / - 1 standard error of the mean

**B**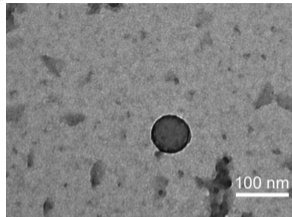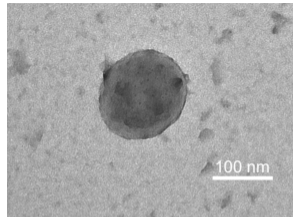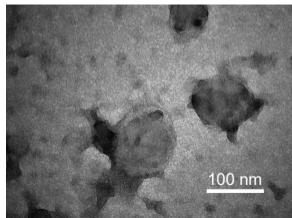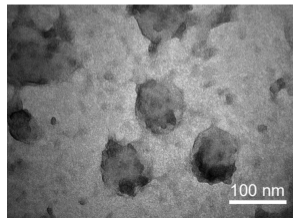

Supplement: mmc6.pdf [file mmc6.pdf]
